# Supplementary material for: Nitroxide-coated silver nanoparticles: synthesis, surface physicochemistry and antibacterial activity
Source: Royal Society of Chemistry journal article supplement (doi:10.1039/c5ra09366j), 2015-01-01
Supplement: c5ra09366j1.pdf [file c5ra09366j1.pdf]

## Supplementary Materials

### **Nitroxide-coated Silver Nanoparticles: Synthesis, Surface Physicochemistry and Antibacterial Activity**

*Magdalena Gozdziowska, Grzegorz Cichowicz, Katarzyna Markowska, Katarzyna Zawada  
and Elżbieta Megiel*

Table of contents:

**Fig. S1** ESI-MS spectrum of bisnitroxide disulfide (DiSS) as a sodium ion  $[M + Na]^+$ .

**Fig. S2** ESR spectrum of DiSS (see Scheme 1) in toluene solution at 293 K.

**Fig. S3** XPS survey spectra of the synthesized AgNPs (sample AR2HH(-5)).

**Fig. S4** XPS survey spectra of DiSS (see Scheme 1 in main text).

**Fig. S5** EDS spectrum of the synthesized AgNPs for sample AI24RT (see Table 1 in main text).

**Fig. S6** UV-vis absorption spectra of acetone solutions of the selected prepared samples directly after synthesis and 2 or 3 months later.

**Fig. S7** UV-vis spectra recorded during synthesis (solution was diluted with DMF 20 x); first spectrum was recorded after addition of all amount of  $NaBH_4$  solution (0h) and the next after a given period of time (reaction conditions the same as for AR2HH(-5) sample preparation).

**Fig. S8** The number averaged hydrodynamic diameter distribution of the synthesized N-AgNPs obtained from DLS measurements.

**Table S1** Results of EDS analysis performed for sample AI24RT (see Table 1 in main text).

**Table S2** Binding Energy Values, full width at half maximum (FWHM) of peaks and atom concentrations derived from XPS analysis of DiSS (see Scheme 1 in the main text).

**Calculations of the surface density of DiSS (sample AR2HH(-5)).**

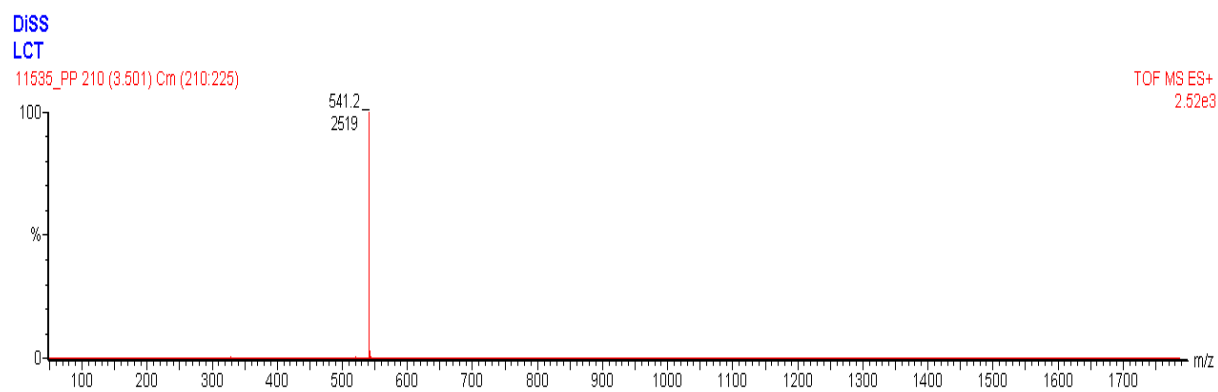

**Fig. S1** ESI-MS spectrum of bisnitroxide disulfide (DiSS) as a sodium ion  $[M + Na]^+$ .

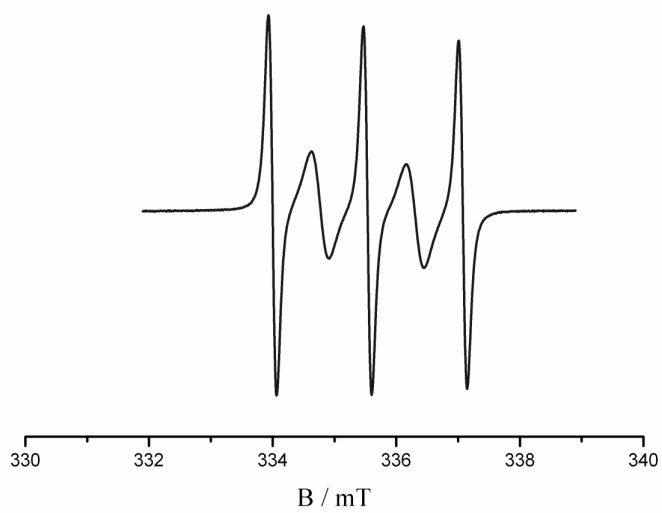

**Fig. S2** ESR spectrum of DiSS (see Scheme 1) in toluene solution at 293 K.

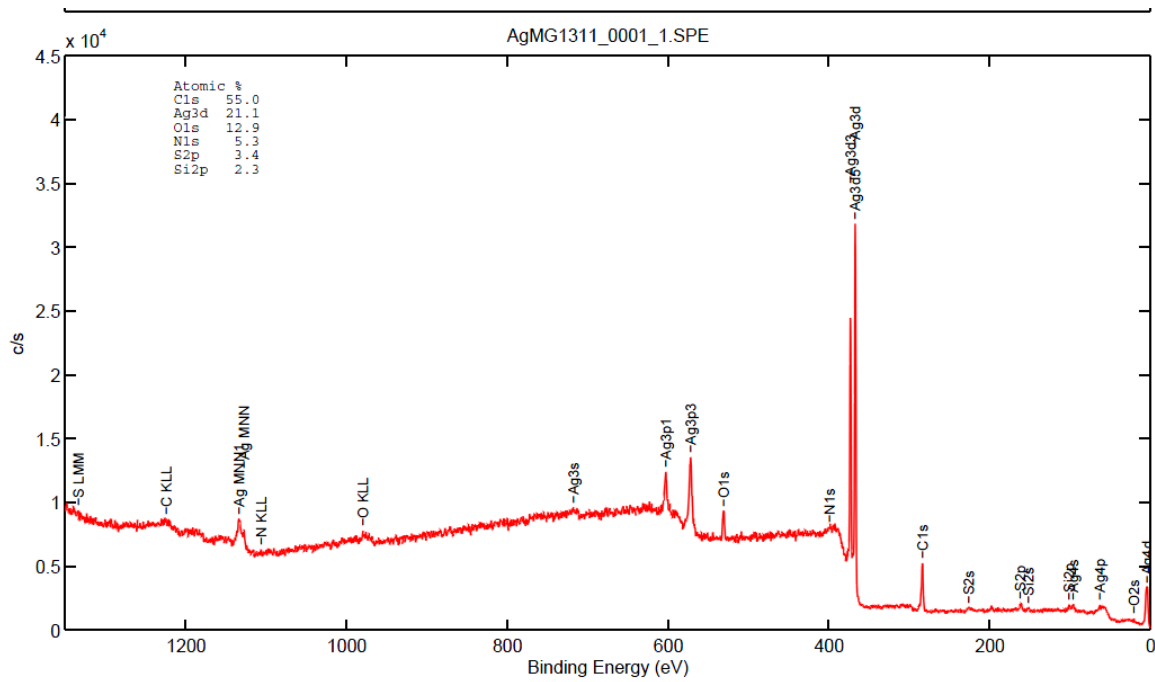

**Figure S3.** XPS survey spectra of the synthesized AgNPs (sample AR2HH(-5)).

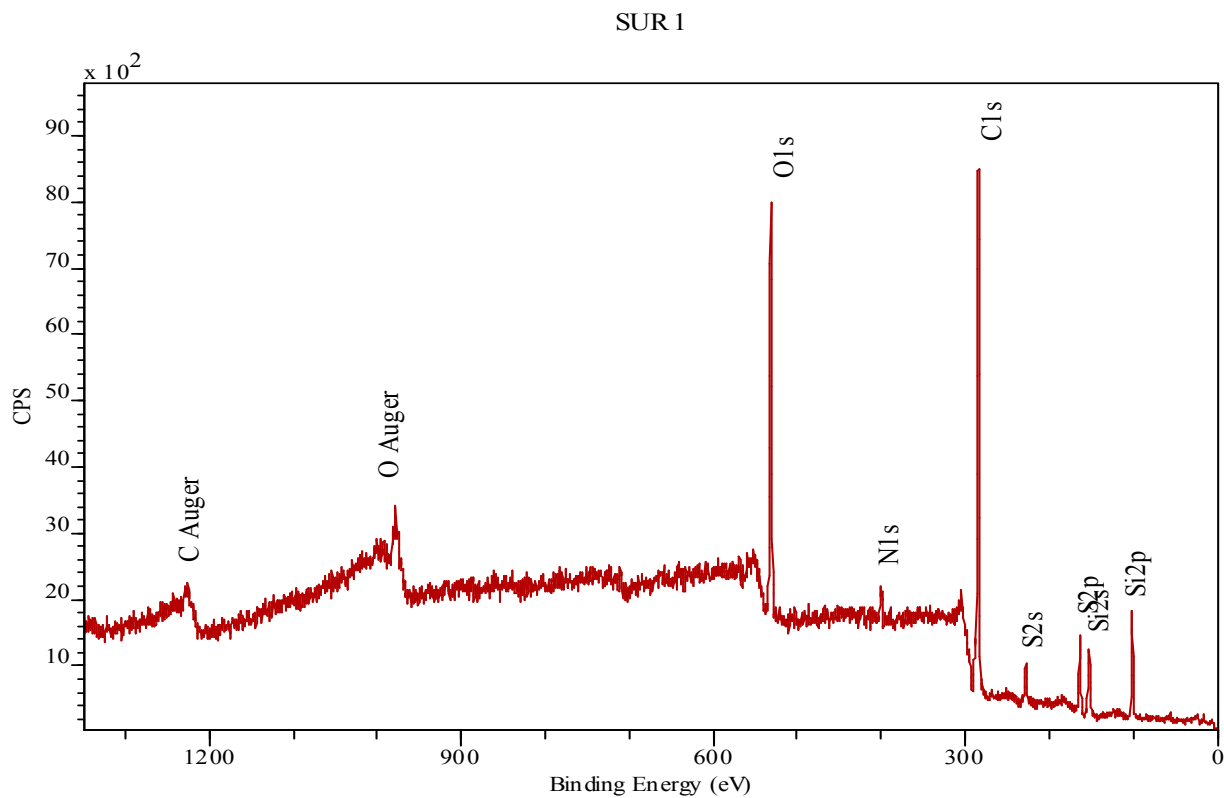

**Figure S4.** XPS survey spectra of DiSS (see Scheme 1).

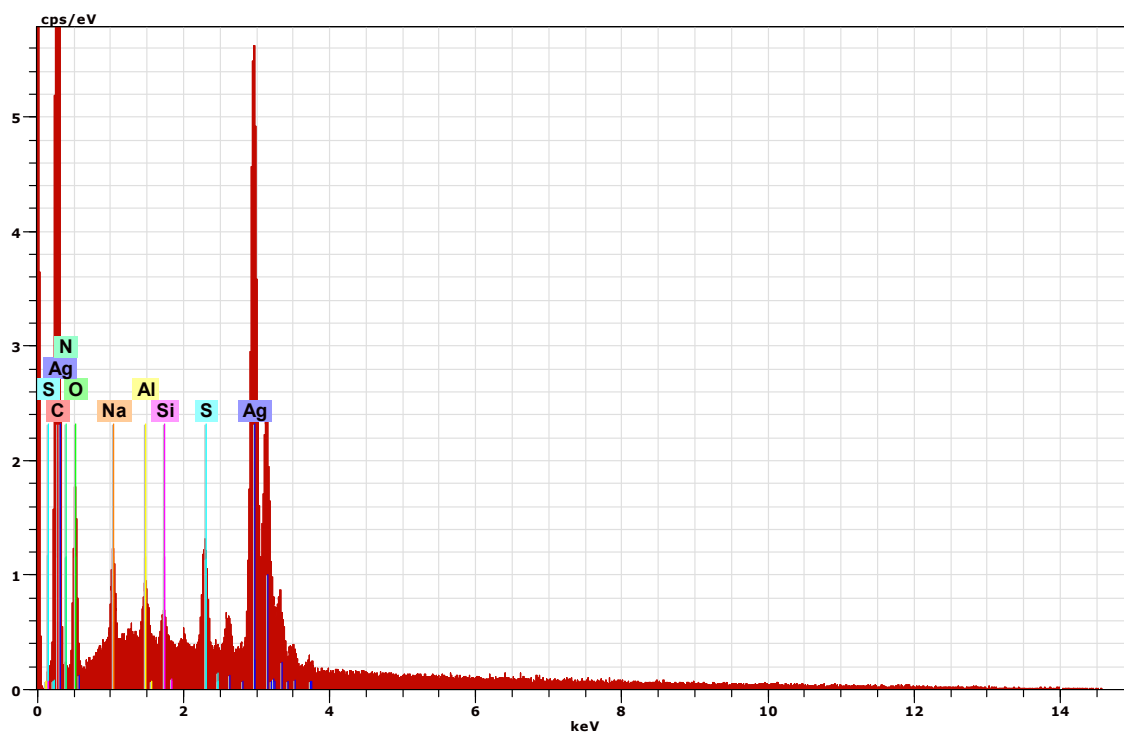

**Figure S5.** EDS spectrum of the synthesized AgNPs for sample AI24RT (see Table 1).

**Table S1**

Results of EDS analysis performed for sample AI24RTH (see Table 1 in main test).

Spectrum: Acquisition

| Element   | Series   | unn. C<br>[wt. %] | norm. C<br>[wt. %] | Atom. C<br>[at. %] | Error (1 Sigma)<br>[wt. %] |
|-----------|----------|-------------------|--------------------|--------------------|----------------------------|
| Carbon    | K-series | 40.32             | 47.07              | 76.41              | 4.68                       |
| Oxygen    | K-series | 8.21              | 9.58               | 11.68              | 1.29                       |
| Silver    | L-series | 32.12             | 37.49              | 6.78               | 1.04                       |
| Sulfur    | K-series | 1.63              | 1.90               | 1.16               | 0.09                       |
| Silicon   | K-series | 0.36              | 0.43               | 0.30               | 0.05                       |
| Aluminium | K-series | 0.62              | 0.72               | 0.52               | 0.06                       |
| Sodium    | K-series | 1.19              | 1.39               | 1.18               | 0.11                       |
| Nitrogen  | K-series | 1.22              | 1.42               | 1.98               | 0.38                       |
| Total:    |          | 85.67             | 100.00             | 100.00             |                            |

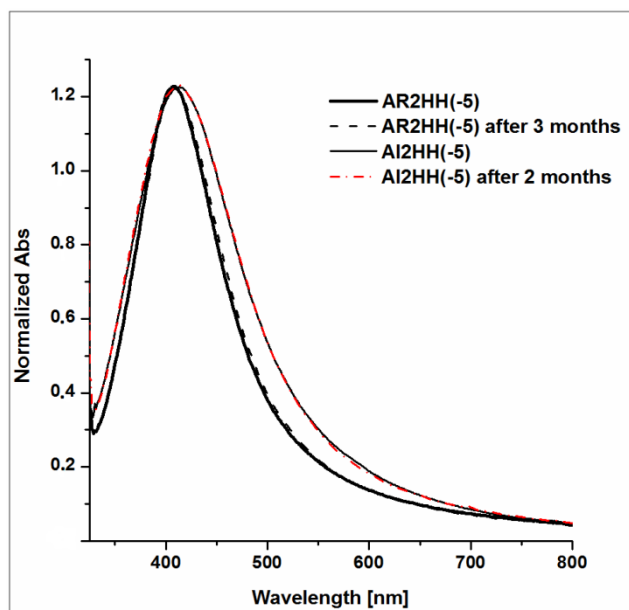

**Figure S6.** UV-vis absorption spectra of acetone solutions of the selected prepared samples directly after synthesis and 2 or 3 months later.

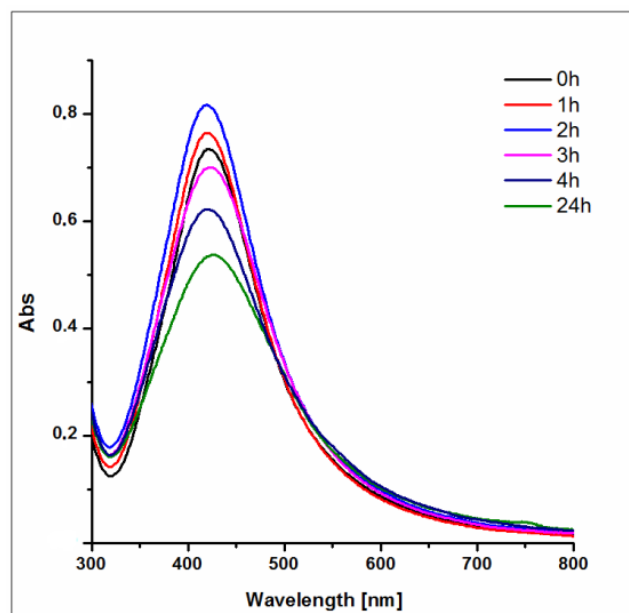

**Figure S7.** UV-vis spectra recorded during synthesis (solution was diluted with DMF 20 x) first spectrum was recorded after addition of all amount of  $\text{NaBH}_4$  solution (0h) and next after a given period of time (reaction conditions the same as for AR2HH(-5) sample preparation).

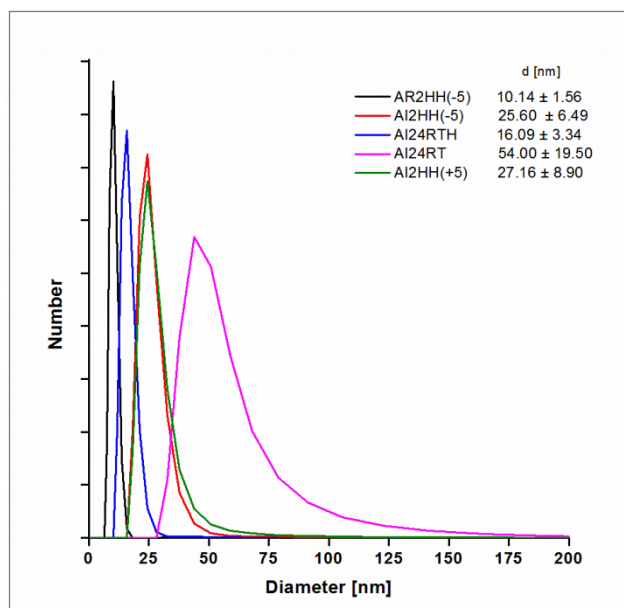

**Fig.S8** The number averaged hydrodynamic diameter distribution of the synthesized N-AgNPs obtained from DLS measurements.

**Table S2**

Binding Energy Values, full width at half maximum (FWHM) of peaks and atomic concentrations derived from XPS analysis of DiSS (see Scheme 1 in main text).

| Orbital             | Position [eV] | FWHM [eV] | Concentration [atom %] |
|---------------------|---------------|-----------|------------------------|
| N 1s                | 399.6         | 2.057     | 3.22                   |
| O 1s                | 530.2         | 1.338     | 0.98                   |
|                     | 531.9         | 1.338     | 17.3                   |
|                     | 533.3         | 1.338     | 3.70                   |
| S 2p <sub>3/2</sub> | 163.6         | 1.247     | 1.97                   |
|                     | 166.8         | 2.205     | 0.48                   |
| S 2p <sub>1/2</sub> | 164.8         | 1.247     | 0.98                   |
|                     | 168.0         | 2.205     | 0.24                   |
| C 1s                | 284.6         | 1.323     | 44.2                   |
|                     | 285.9         | 1.323     | 14.1                   |
|                     | 287.1         | 1.014     | 1.22                   |
|                     | 288.9         | 1.014     | 2.82                   |

### **Calculations of the surface density of DiSS (sample AR2HH(-5))**

$r = 3.5 \text{ nm}$ ;  $V = 1.8 \times 10^{-19} \text{ cm}^3$ ; ( $\rho = 10.5 \text{ g cm}^{-3}$ );  $m = 1.88 \times 10^{-18} \text{ g}$ ;  $S = 153.86 \text{ nm}^2$ ,  $N_{\text{Ag}} = 10\ 510$

TGA: 80% Ag, 20% DiSS; mass of DiSS per one nanoparticle  $m = 4.78 \times 10^{-19} \text{ g}$ ;  $N_{\text{ligands}} = 548$ ;

$d_{\text{ligands}} = 3.5 \text{ nm}^2$

XPS (S2s): Ag 23.7 % (atom %), S 2.5 %;  $N_{\text{Ag}}/N_{\text{ligand}} = 18.9$ ;  $N_{\text{ligands}} = 556$ ;  $d_{\text{ligands}} = 3.6 \text{ nm}^2$

XPS (N1s): Ag 23.7 % (atom %); N 2,8%;  $N_{\text{Ag}}/N_{\text{ligand}} = 16.9$ ;  $N_{\text{ligands}} = 621$ ;  $d_{\text{ligands}} = 4.0 \text{ nm}^2$

XPS (C1s): Ag 23.7 % (atom %); C 52.4%;  $N_{\text{Ag}}/N_{\text{ligand}} = 10.9$ ;  $N_{\text{ligands}} = 964$ ;  $d_{\text{ligands}} = 6.2 \text{ nm}^2$

XPS (O1s): Ag 23.7 % (atom %); O 13.6%;  $N_{\text{Ag}}/N_{\text{ligand}} = 10.4$ ;  $N_{\text{ligands}} = 1005$ ;  $d_{\text{ligands}} = 6.5 \text{ nm}^2$

where: nanoparticle radius,  $V$  – nanoparticle volume (idealized nanosphere),  $\rho$  - silver density,  $m$  – nanoparticle mass,  $S$  – nanoparticle surface,  $d_{\text{ligands}}$  – DiSS area density
